1 Genomes of keystone *Mortierella* species lead to better *in silico* prediction  
2 of soil mycobiome functions from Taiwan's offshore islands

3

4

5 Yu-fei Lin<sup>1</sup>, Wei-An Liu<sup>1</sup>, Yu-Ching Liu<sup>1</sup>, Hsin-Han Lee<sup>1,2,3</sup>, Yen-Ju Lin<sup>1</sup>, Ed-Haun  
6 Chang<sup>4</sup>, Meiyeh J Lu<sup>1</sup>, Chih-Yu Chiu<sup>1</sup> and Isheng Jason Tsai<sup>1,2,3</sup>

7

8

9 <sup>1</sup>Biodiversity Research Center, Academia Sinica, Taipei, Taiwan

10 <sup>2</sup>Bioinformatics Program, Taiwan International Graduate Program, National Taiwan  
11 University, Taipei, Taiwan

12 <sup>3</sup>Bioinformatics Program, Institute of Information Science, Taiwan International  
13 Graduate Program, Academia Sinica, Taipei, Taiwan

14 <sup>4</sup>Mackay Junior College of Medicine, Taipei, Taiwan

15

16 Correspondence: Yu-fei Lin [linyf@gate.sinica.edu.tw](mailto:linyf@gate.sinica.edu.tw) and Isheng Jason Tsai  
17 [ijtsai@gate.sinica.edu.tw](mailto:ijtsai@gate.sinica.edu.tw); +886-2787-2270

18

19

20 Word count: 5633

21

22

23 Declaration of interest: The authors declare that there are no conflicts of interests.

24

25

26 Key word: *Mortierella*, mycobiome, keystone taxa, functional prediction, island  
27 biogeography, network analysis

28

29

30 **Abstract**

31

32 The ability to correlate the functional relationship between microbial communities  
33 and their environment is critical to understanding microbial ecology. There is emerging  
34 knowledge on island biogeography of microbes but how island characteristics influence  
35 functions of microbial community remain elusive. Here, we explored soil mycobiomes  
36 from nine islands adjacent to Taiwan using ITS2 amplicon sequencing. Geographical  
37 distances and island size were positively correlated to dissimilarity in mycobiomes, and  
38 we identified 56 zero-radius operational taxonomic units (zOTUs) that were  
39 ubiquitously present across all islands, and as few as five *Mortierella* zOTUs dominate  
40 more than half of mycobiomes. Correlation network analyses revealed that seven of the  
41 45 hub species were part of the ubiquitous zOTUs belonging to *Mortierella*,  
42 *Trichoderma*, *Aspergillus*, *Clonostachys* and *Staphylotrichum*. We sequenced and  
43 annotated the genomes of seven *Mortierella* isolates, and comparative predictions of  
44 KEGG orthologues using PICRUSt2 database updated with new genomes increased  
45 sequence reads coverage by 62.9% at the genus level. In addition, genes associated with  
46 carbohydrate and lipid metabolisms were differentially abundant between islands  
47 which remained undetected in the original database. Predicted functional pathways  
48 were similar across islands despite their geographical separation, difference in  
49 differentially abundant genes and composition. Our approach demonstrated the  
50 incorporation of the key taxa genomic data can improve functional gene prediction  
51 results and can be readily applied to investigate other niches of interests.

52

53

## 54 1. Introduction

55

56 Fungi are one of the most diverse groups of organisms in the biological kingdom—  
57 with an estimated 6.2 million species [1]—and play an essential in ecosystems with  
58 their ability to decompose organic matters encompassing all ecological niches, from  
59 soil [2] to water [3]. The Earth Microbiome Project was the catalyst for an extensive  
60 profiling of microbes in soil [4–7]. Protocols for metabarcoding characterisation of  
61 eukaryotic species quickly followed [8,9], for instance, characterising the fungal  
62 community of a given environment is defined as the mycobiome [10]. Climate and  
63 vegetation were determined to be the main factors driving mycobiome community  
64 diversity and structure [11,12]. Profiling of soil biomes around the world showed that  
65 earth’s soil biome is dominated by as few as 83 fungal phylotypes. The predominant  
66 soil fungal phylum is Ascomycota, accounting for ~18% of sequence abundance [13].

67

68 Although recent efforts to characterise the distribution and abundance of fungal  
69 species in different niches have revealed insights around host-fungal relationships [14–  
70 16], little is known about the functional relationship between fungal communities and  
71 their respective niches. Metatranscriptomics is a direct approach to elucidating the  
72 relationship between the fungal community and its surroundings. For example, the  
73 ectomycorrhizae community metatranscriptome and its metabolic pathways have been  
74 shown to respond to perturbations caused by different fertilisation strategies in  
75 Norwegian spruce trees [17]. Unfortunately, a major technical hurdle in  
76 metatranscriptomic approach is the strong bias in the host-fungi biomass ratio [18].  
77 Challenges include i) most sequencing reads from samples originated from the host,  
78 making only a few fungal reads available for subsequent analyses, and ii) filtering of  
79 reads from the host might not be readily applicable due to the limited availability of the  
80 host genome. In addition, not enough fungal genomes are available from various  
81 environments, rendering challenges in classification and subsequent analyses of fungal  
82 sequences.

83

84 To overcome these limitations, an alternative and cost-effective approach to  
85 delineating microbial functional relationships is *in silico* inference using tools—e.g.,  
86 Tax4Fun [19], FAPROTAX [20] and PICRUST2 [21]—developed to infer functions of  
87 the microbiome from relative abundances of phylogenetically classified amplicons.  
88 These tools have been used extensively, especially in many gut bacterial microbiome

89 studies. Functional changes associated with perturbations in the gut microbiome from  
90 antibiotics [22] or disease states [23] have been predicted. Benchmark studies show that  
91 predictions made from amplicon sequencing are comparable to those from shotgun  
92 sequencing of four independent sets of microbiome data, with similar accuracy [21],  
93 which is the current gold standard for inferring functional gene family and pathway  
94 [24–26]. Such tools also exist for mycobiomes, such as FUNGIpath, which reconstructs  
95 fungal metabolic pathways by predicting putative pathways from protein sequence  
96 orthologies [27]. Annotated fungal genomes allow for further categorisation into  
97 functional guilds based on their trophic state using FUNGuild [28], reflecting their  
98 putative ecological roles. *In silico* prediction of functions remained limited in fungi  
99 owing to limited genomic data. For example, PICRUSt2 utilises 41,926 bacterial and  
100 archaeal genomes, but only 190 fungal genomes [21], and is biased towards model  
101 organisms [29]. One major fungal taxon that lacks genome information is the genus  
102 *Mortierella*, which is ubiquitous in soil samples [11,30]; the GlobalFungi database  
103 (<https://globalfungi.com>, accessed September 2021) revealed that *Mortierella* can be  
104 found in all the deposited soil sample records (n=18,759). However, there are only 44  
105 publicly available *Mortierella* genomes (16 and 28 deposited in the JGI MycoCosm and  
106 NCBI databases, respectively). This genus has recently received attention as it was  
107 shown to be an important ectomycorrhiza for facilitating plant development. There is  
108 currently an urgent need to incorporate well-annotated genomes to yield better  
109 inferences on mycobiomes' functions across various niches.

110

111 This study aims to characterise the functional roles of mycobiomes in forests of  
112 nine offshore islands proximal to Taiwan. We examined fundamental features of island  
113 biogeography—e.g., the species-area distribution relationship, species vicariance and  
114 the distance-decay relationship [31,32]. We identified the key fungal taxa to be the  
115 *Mortierella* genus, then isolated and sequenced the taxa to obtain high-quality and  
116 annotated genomes. We assessed whether functional metabolic pathway predictions of  
117 the mycobiome could be improved by incorporating novel genomes into existing  
118 functional pathway prediction workflows from amplicon studies and compared them  
119 with the current pipeline.

120

121

122

## 123 2. Materials & methods

124

### 125 2.1 Study sites and sample collection

126 The study was conducted on several remote islands (**Fig.1**). The archipelagos of  
127 Matsu islands (MT), are located 10–50km offshore of mainland China and face the  
128 Taiwan Strait, including Beigan (MT-BG), Nangan (MT-NG), Dongju (MT-DJ), Hsiju  
129 (MI-SJ), and Dongyin (MT-DY) Islet. Two tropical volcanic islands, Orchid Island (OI),  
130 and Green Island (GI) are located about 60 and 30 km, respectively, from the  
131 southeastern part of Taiwan and face the Pacific Ocean. The coral reef-originated  
132 Dongsha (DS) Islet and Taiping (TP) Islet are located south-west of Taiwan in the South  
133 China Sea.

134 The soils on the five MT islands comes from granite parent material, and classified  
135 as haplustults. The soils on OI and GI come from andesite parent material, and were  
136 classified as paleudults. Detail of soil and forest types was described in [33,34]. The  
137 soil on DS and TP are classified as entisol, and their native vegetation are  
138 predominantly covered with screw pine (*Pandanus tectorius*) and natural tropical  
139 forest, respectively.

140 From 2016–2017, surface soil samples (0–10 cm deep) from the MT, OI and GI  
141 were collected as previously described by Lin et al. [33]. Soil from the DS and TP  
142 were sampled in 2018–2019 (**Fig. 1**). Leaf litter was avoided. Approximately ten to  
143 twelve 10 cm deep soil cores were collected using a core borer. Soil samples were  
144 stored on ice before transporting back to the laboratory, where they were sieved  
145 through 2mm steel mesh and homogenised by manual mixing and stored at -20°C until  
146 use. Edaphic data were collected as described previously [33,34], with the following  
147 metadata collected: microbial biomass carbon (MBC), microbial biomass nitrogen  
148 (MBN), microbial biomass phosphate (MBP), pH, cellulase, xylanase,  $\beta$ -  
149 glucosaminidase, phosphomonoesterase, urease, proteinase, total phospholipid-  
150 derived fatty acid (PLFA), fungal PLFA, bacterial PLFA, arbuscular mycorrhizal  
151 fungal PLFA (AMF-PLFA), and the main vegetation around the sample site. Mean  
152 monthly temperature (MMT) and mean monthly precipitation (MMP) were taken  
153 from the records of the nearest weather station (<https://opendata.cwb.gov.tw/index>).

154

### 155 2.2 Total genomic DNA extraction from soil samples

156 Genomic DNA of homogenised soil was extracted using PowerSoil DNA  
157 extraction kits (Qiagen, Hilden, Germany). Approximately 0.25 g of soil was extracted

158 from each sample with minor modifications to the manufacturer's protocol. Sample  
159 homogenisation and lysis were performed using PowerLyzer 24 (Qiagen, Hilden,  
160 Germany) set at 2,000 rpm for 2 X 5 min. After solutions C2 and C3 were added, the  
161 lysate were kept at 4° for 1 hr.

162

### 163 **2.3 Recovery of *Mortierella* isolates from soil**

164 To isolate *Mortierella* species, one gram of soil sample was serially diluted ten-  
165 fold in 1.0 mL up to 10<sup>-5</sup> with 1 X PBS. For each dilution, 200 µL of suspension was  
166 plated onto potato dextrose agar (PDA) supplemented with 50 µg/mL chloramphenicol  
167 and incubated at 28°C and monitored daily for fungal growth in a concentric flower-  
168 like pattern, which is characteristic of *Mortierella*. Pure isolates were obtained after two  
169 successive rounds of subculturing onto PDA. We obtained seven different *Mortierella*  
170 isolates based on differences in their colony morphology. The identities of these isolates  
171 were determined by amplifying the full length internal transcribed spacer region (ITS)  
172 using the ITS1 and ITS4 primer pair [35] and Sanger sequencing.

173

### 174 **2.4 Genomic DNA extraction and sequencing of *Mortierella* isolates**

175 Total nucleic acid of *Mortierella* was extracted using the protocol from [36]. In  
176 brief, fungal tissues were harvested from PDA and powdered using liquid nitrogen and  
177 pre-chilled mortar and pestle. Preheated SDS lysis buffer containing RNaseA was  
178 added to the tissue powder. The lysate was homogenised by inversion, then incubated  
179 at 70°C for 30 min and inverted every 5 min. Contaminants were precipitated by adding  
180 5 M potassium acetate and incubated on ice for 10 min. Debris was pelleted by  
181 centrifugation at 10,000 *x rcf* for 10 min. Nucleic acid in the aqueous phase were  
182 transferred to new tube and recovered by adding previously prepared magnetic  
183 Serapure beads and incubated at room temperature with gentle agitation for 15 min.  
184 Beads were pelleted by centrifugation at 10,000 *x rcf* for 3 min. Supernatant was  
185 decanted with care, then pelleted and washed with 70% ethanol twice. Beads were air-  
186 dried for 5 min and DNA eluted with 10 mM Tris-Cl pH 8 buffer preheated to 50°C.  
187 Libraries were constructed and paired end sequenced with Illumina HiSeq 2500 at  
188 Next-Generation Sequencing High Throughput Genomics Core at Biodiversity  
189 Research Center in Academia Sinica. Long-read sequencing of *Mortierella* was  
190 conducted using the Oxford Nanopore sequencing platform. A sequencing library was  
191 constructed using a Ligation Sequencing Kit (SQK-LSK109; Oxford Nanopore).  
192 Sequencing was carried out using R9.4 flowcells (FLO-MIN106) on a MinION (Mk1B)

193 or GridION (Mk1) sequencer.

194

## 195 **2.5 Transcriptome sequencing of *Mortierella* isolates**

196 Approximately 50 mg of fungal tissue were transferred into a 2 mL screw-cap tube  
197 containing ceramic beads. The tubes were snap-frozen in liquid nitrogen for 5 min.  
198 Tissues were homogenised using PowerLyzer 24 set at 3,000 rpm for 20 sec. Tubes  
199 were removed from the homogeniser, temporarily allowing the contents to return to a  
200 liquid state, and snap-frozen again. The homogenisation process was repeated three  
201 times until a powder was obtained. The remainder of the extraction protocol was carried  
202 out using TRIzol (Cat. #15596026; Invitrogen) as instructed by the manufacturer. RNA  
203 sequencing libraries were prepared using Illumina poly-A stranded RNA library  
204 preparation kit and sequenced using Illumina HiSeq 2500 paired-end 2 x 150bp in rapid  
205 mode.

206

## 207 **2.6 Construction and sequencing of amplicon libraries**

208 Amplicon libraries were constructed by amplifying the ITS2 region using the  
209 protocol described by [11]. The DNA concentrations were quantitated using  
210 NanoDrop™ 1000 (ThermoFisher Scientific, Massachusetts, US). Amplicons were  
211 normalised using SequalPrep Normalization Plate Kit (ThermoFisher Scientific,  
212 Massachusetts, US). Normalised amplicons were pooled at equal volumes into a single  
213 tube, concentrated using AMPure XP beads (Beckman Coulter, California, US) at a 1:1  
214 ratio and constructed into sequencing libraries using TruSeq DNA Preparation Kit  
215 (Illumina Inc, California, US). Sequencing was carried out using Illumina MiSeq  
216 paired-end 2 X 300 bp and performed by the High-Throughput Sequencing Core  
217 Facility in Biodiversity Research Center in Academia Sinica.

218

## 219 **2.7 Amplicon sequence read pre-processing**

220 Sequencing data generated from ITS libraries were demultiplexed using *sabre* (ver.  
221 0.9). Reads were trimmed of primer sequences. Paired reads were merged and quality  
222 filtered using USEARCH v11.0.0 with parameters suggested by the UPARSE pipeline  
223 [37]. was used. Filtered sequence reads were removed of singleton and chimeric  
224 sequences and clustered into zero-radius operational taxonomic units (zOTUs) using  
225 the UNOISE3 algorithm [38]. Taxonomy was determined using the SINTAX algorithm  
226 [39] against the RDP database (v16). A zOTU table was generated using the  
227 *usearch\_global* function.



228

## 229 **2.8 Data analysis**

230 Sample preparation variations were assessed by sequencing the Matsu  
231 archipelagos (MT) and Green Island (GI) in triplicate and quadruplet, respectively.  
232 Non-metric dimensional scaling (NMDS) suggested minor variation between technical  
233 replicates (**Supplementary Fig. 1**). Replicates were merged by calculating the mean of  
234 zOTU counts between replicates. 72.4% and 15.8% of the zOTUs were classified at the  
235 phylum and genus levels. Unclassified zOTU sequences were identified by BLAST  
236 against the ITS\_RefSeq NCBI database [40] and non-fungal zOTUs were removed.

237

238 Outputs of the UPARSE pipeline were imported into the R environment using  
239 RStudio. Data were analysed using the *phyloseq* package (ver. 1.34) and diversity  
240 analyses were conducted with the *vegan* package (ver. 2.5-7). The *ordiR2step* function  
241 was used to perform the Akaike information criterion (AIC) with a forward selection  
242 model on the edaphic and climatic variables and fungal profiles. The statistical  
243 significance of the differences in diversity was calculated using analysis of variance  
244 (ANOVA), Tukey Honest Significant Difference test, and permutational multivariate  
245 analysis of variance (*adonis*) when appropriate. The intersecting zOTUs from different  
246 islands were calculated using *UpSetR* (ver. 1.4) and visualised with *ComplexHeatmap*  
247 (ver. 2.4.3) packages. A co-occurrence network was constructed using *fastspar* (ver.  
248 1.0), a C++ version of the SparCC algorithm [41,42]. Network statistics were calculated  
249 using the built-in plugin ‘Analyze Network’ in Cytoscape (ver. 3.8.1). Node strength  
250 was calculated by averaging the absolute value of connected edge-weight per node.  
251 Modules in the biological network were determined using WGCNA [43]. The zOTUs  
252 were characterised into peripherals, connectors modules hubs and network hubs using  
253 within-module degree (z score) and among-module connectivity (c score) thresholds as  
254 previously described [44].

255

## 256 **2.9 Assembly, annotation and phylogenomic analyses of *Mortierella* isolates**

257 Raw sequence data from nanopore sequencing were basecalled using guppy (ver.  
258 3.3.3). Read error correction was conducted using Canu (ver. 1.9) and *de novo* assembly  
259 was performed with Flye (ver. 2.5). The consensus sequence of the assembly was  
260 corrected with four rounds of Racon (ver. 1.4.6) and then once using Medaka (ver.  
261 0.11.0). Low-quality Illumina bases were trimmed using Trimmomatic (ver. 0.36), and  
262 genome assembly was polished with Illumina sequencing data using five rounds of



263 Pilon (ver1.22).

264 RNAseq reads of each *Mortierella* species were aligned to corresponding  
265 assemblies using STAR (ver. 2.7.2d [45]) and reference assembled using Stringtie (ver.  
266 2.1.1 [46]) and Trinity (ver. 2.9.1 [47]). These transcripts were filtered and picked using  
267 MIKADO (ver. 2.0rc6 [48]). The passed transcripts were then used as hints and  
268 underwent an initial round of annotation using BRAKER2 (ver. 2.1.5[49]). The  
269 BRAKER2 predictions, protein sequences from uniprot-fungi, *Rhizophagus irregularis*  
270 DAOM197198 and *Mortierella elongata* AG-77 from JGI, and RNAseq-assembled  
271 transcripts were used as input for MAKER2 (ver. 3.01.03 [50]) annotation pipeline to  
272 generate a final set of gene model predictions. BUSCO was run on the proteomes of  
273 seven *Mortierella* isolates (ver. 5.0.0 using fungi\_odb10 and mucoromycota\_odb10  
274 database, [51]).

275

276 ITS phylogenetic tree was constructed using the 7 *Mortierella* isolates and 298  
277 sequences of *Mortierella* strains [52]. Full-length ITS sequences of the 298 strains were  
278 retrieved from NCBI using Batch Entrez tool using accession number listed in the  
279 publication [52]. ITS sequence of soil isolates from this study was obtained using  
280 Sanger sequencing with ITS1 and ITS4 primer pairs [35]. Sequences were aligned using  
281 MAFFT (ver. 7.471) with options `--maxiterate 1000 --localpair`. Alignments were  
282 trimmed using TrimAL (ver. 1.2) with option `--automated1`. Phylogenetic tree was  
283 calculated from trimmed sequences using IQ-Tree with the options `--MF --bb 1000`, the  
284 best model determined was TIM2+F+R10.

285

286 Orthogroups of seven *Mortierella* isolates and 27 representative species  
287 (**Supplementary Table 1**) were identified using OrthoFinder (ver. 2.27, [53]). A  
288 maximum likelihood phylogeny was inferred using an concatenated alignment of single  
289 copy orthologs using FastTree (ver. 2.1.10, [54]) with 1000 bootstrap and options `-`  
290 `gamma -lg`.

291

## 292 **2.10 Construction of custom fungal database for PICRUSt2**

293 PICRUSt2 contains a built-in fungal database for functional inference based on  
294 ITS sequencing data. Instructions for using a non-default database and generating  
295 custom databases are detailed on the PICRUSt2 GitHub page  
296 (<https://github.com/picrust/picrust2>). Briefly, ITS sequences of *Mortierella* isolates  
297 were determined by Sanger sequencing with the ITS1 and ITS4 primer pair [35]. ITS

298 regions of *Mortierella* genomes from the JGI database were identified by aligning  
299 against the *Mortierella* ITS sequence from the NCBI database using BLAST. The list  
300 of genomes incorporated are listed in **Supplementary Table 1**. A multiple-sequence  
301 alignment file containing newly determined ITS sequences and the existing sequences  
302 from PICRUSt2 were generated using MAFFT (v7.471). A phylogenetic tree file and a  
303 hidden-Markov model file were calculated from the new alignment using IQ-TREE  
304 (ver. 1.6.12) and *hmmbuild* (ver. 3.1b2), respectively. A model file was generated using  
305 RaxML (ver. 8.2.11, [55]). ITS copy number in the *Mortierella* genomes was  
306 determined by aligning against the NCBI ITS reference database using BLAST.  
307 Enzyme commission (EC) counts of the *Mortierella* genomes were extracted and  
308 tabulated from GFF files of *Mortierella* genomes. KEGG orthologues (KO) were  
309 inferred from EC number using the *KEGGREST* package (ver. 1.28.0) in R. The new  
310 ITS copy number, EC counts, and KO counts were appended to their respectively  
311 PICRUSt2 files.

312

### 313 **3. Results**

314

#### 315 **3.1. Data statistics**

316 DNA samples of soils from nine Taiwan offshore islands (**Fig. 1**) were purified  
317 and characterised by sequencing the fungal ITS2 region using the Illumina MiSeq  
318 platform. A total of 3,711,303 reads with an average of 78,964 reads for each of 47  
319 samples were used for downstream analysis. Deduplicated reads were denoised and  
320 decontaminated into 8,528 zero-radius operational taxonomic units (zOTUs) [38] with  
321 an average of 1,257 zOTUs per sample. A total of 94.8% and 92.0% of zOTUs were  
322 classified successfully at the phylum and genus level, respectively.

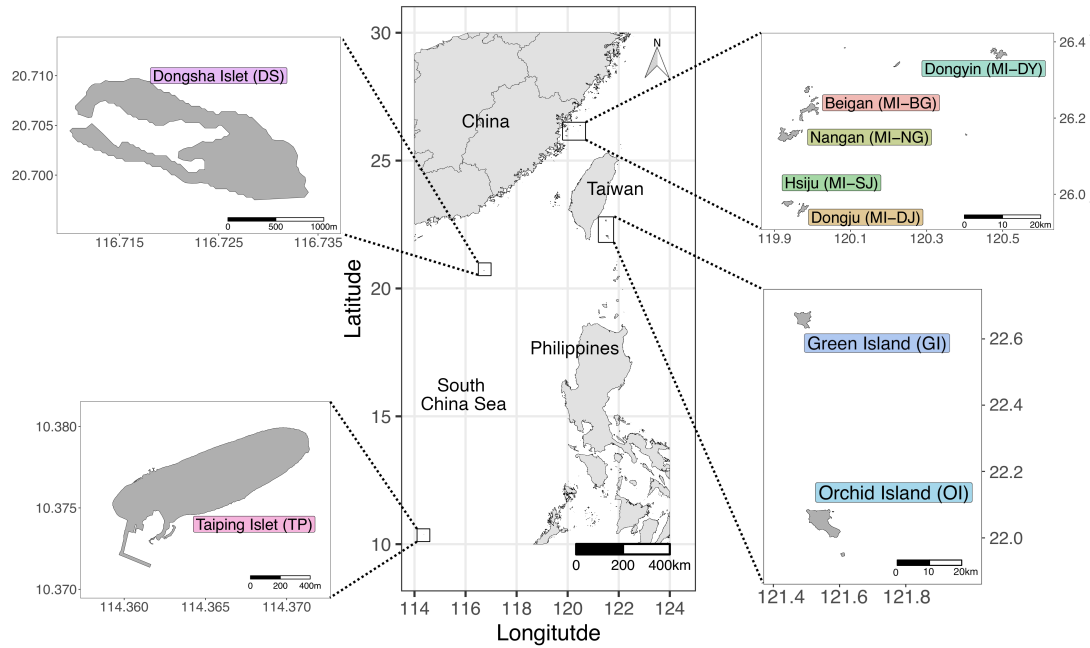

323

324 **Fig. 1. Map of the sampling sites from Taiwan's offshore islands.**

325

### 326 3.2. Comparison of soil fungal diversities between islands

327 An overview of fungal alpha diversity indices showed a high Chao1 index and low  
328 effective number of species (ENS) for all sampled islands (**Fig. 2**), with no strong  
329 correlation to edaphic data in either index (**Supplementary Fig. 2**). Higher fungal  
330 richness was observed in larger islands (**Supplementary Table 2**; MT-BG, MT-NG,  
331 MT-DJ, MT-SJ, OI and GI median Chao1 = 2,035.0, 1,719.4, 1,809.3, 1,910.2, 1,323.2  
332 and 1,850.7, respectively), and small islets such as Dongyin (MT-DY), Dongsha (DS)  
333 and Taiping (TP) showed low fungal richness (MT-DY, DS and TP median Chao1 =  
334 864.0, 976.4 and 373.7, respectively). In contrast to the variation in species richness,  
335 all islands were found to have similar ENS, except GI (**Supplementary Table 2**; all  
336 islands – mean ENS = 53.4, GI – mean ENS = 142.0), which suggests that island size  
337 impacted total fungal richness but not the number of representative taxa in the soil.

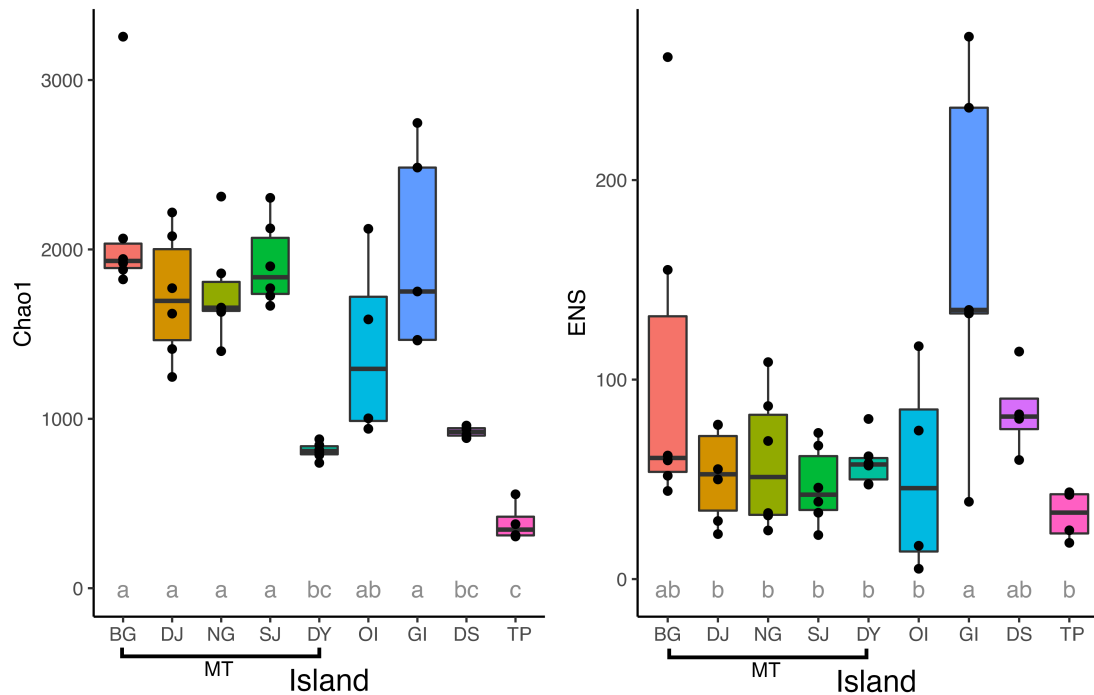

338

339 **Fig. 2. Fungal alpha diversity indices of the offshore islands.** Richness and evenness  
340 are represented by Chao1 and effective number of species (ENS), respectively. Pairwise  
341 significant differences in statistical means between islands were calculated using  
342 ANOVA and Tukey HSD and denoted using letters. E.g. islands labelled *a* are not  
343 significantly different to island with the same letter. Islands labelled *ab* indicate they  
344 are not statistically significant to neither group *a* or *b*.

345

346 The species-area relationship on these nine islands revealed that island size is  
347 positively correlated to alpha and gamma diversities (**Fig. 3a**), but not beta diversity,  
348 suggesting an area *per se* effect. Distance-decay relationship analysis demonstrated that  
349 the mycobiome similarities between islands were inversely correlated with  
350 geographical distance (**Fig. 3b; left panel**). In comparison, intra-island mycobiome  
351 dissimilarities demonstrated a weak positive or no correlation with distance  
352 (**Supplementary Fig. 3**), suggesting within an island the likelihood of species  
353 migration and colonisation remained high, thus reducing differences between  
354 communities. Independent analyses of the abundant (>1% relative abundance) and rare  
355 (<1% relative abundance) fungal taxa exhibited the same distance-decay trend in their  
356 community dissimilarities (**Fig. 3b; middle and right panels**). However, rare taxa  
357 showed a higher level of dissimilarity (Bray-Curtis > 0.6) at a close distance than the  
358 abundant taxa suggesting that rare taxa are specialists in the environment, shaped by  
359 islands' niches and remained relatively dissimilar regardless of distance.

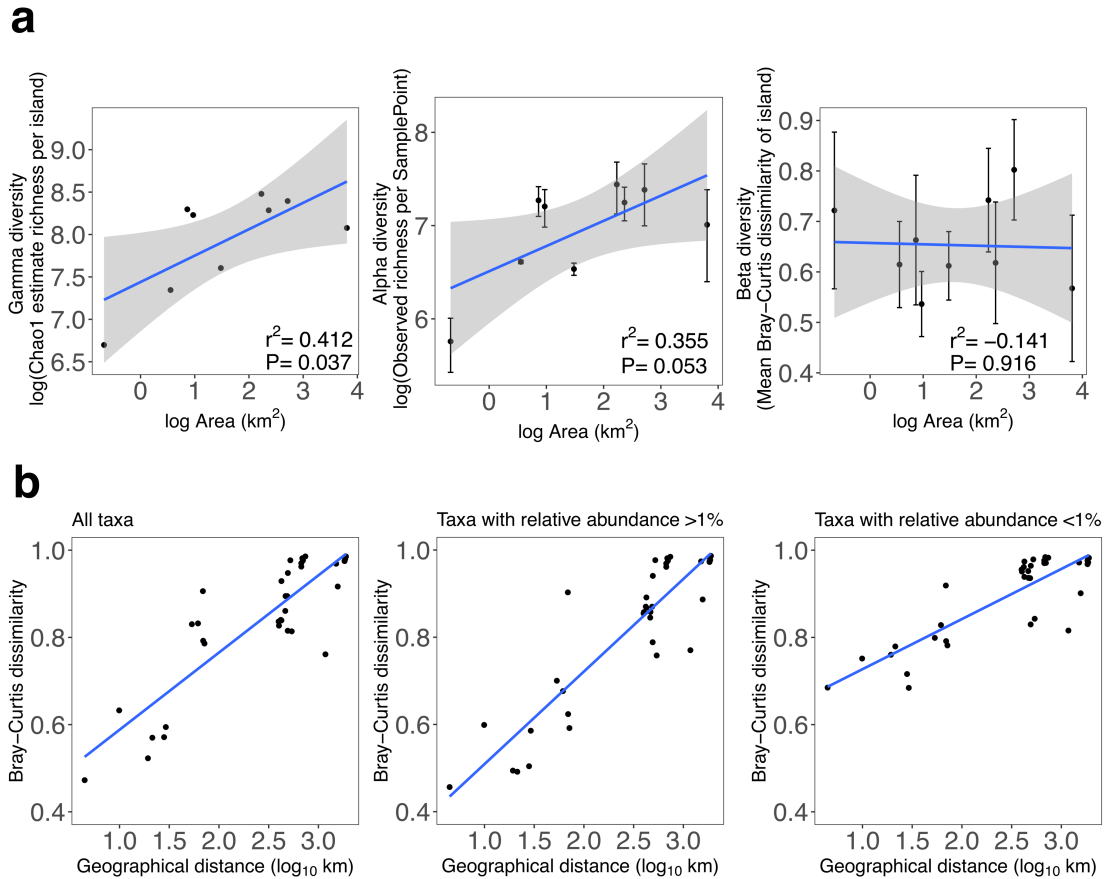

360

361

362 **Fig 3. Species-area and distance-decay relationship of Taiwan's offshore islands. a.**

363 Offshore island species-area relationship. Alpha diversity was calculated from the

364 observed zOTU richness for each sample point. Averages represent the island and

365 standard deviation from the mean is indicated with error bars. Beta diversity was

366 calculated from the average Bray-Curtis distance within each island. Gamma diversity

367 is represented by the Chao1 estimator of the island. **b.** Distance-decay relationship

368 across Taiwan's offshore islands. Each point represents a pairwise community

369 difference between islands. Linear regression was used to calculate the line of best fit.

370

371 The mycobiome structures between islands were driven by island soil type, as the

372 samples grouped in the NMDS space according to their island parent rock material (**Fig.**

373 **4a**). For example, soil mycobiomes of MT (granite) formed an independent cluster.

374 Interestingly, mycobiomes of GI (andesite) and DS (coral) were found to be alike

375 despite the different soil types and geographically distant. Overall, PERMANOVA

376 analysis of fungal profiles between all islands showed significant differences between

377 NG and MT-DY only ( $P=0.036$ ), suggesting that the communities were similar across

378 all islands. We collected 17 edaphic and climatic metadata, and 10 of the 17 variables  
379 were found to be correlated with the soil mycobiome (**Supplementary Table 3**). Fungal  
380 decomposers (Mortierellomycota and Mucoromycota) and catabolic enzyme activities  
381 (cellulase, xylanase and  $\beta$ -glucosaminidase) exhibited a positive correlation with MT  
382 mycobiomes. The soil variables MBC, MBN, pH and the abundance of Ascomycota  
383 were correlated with the mycobiome of GI, DS and TP (**Fig. 4b**). The soil samples from  
384 OI did not correlate with any metadata or specific fungal phyla.  
385

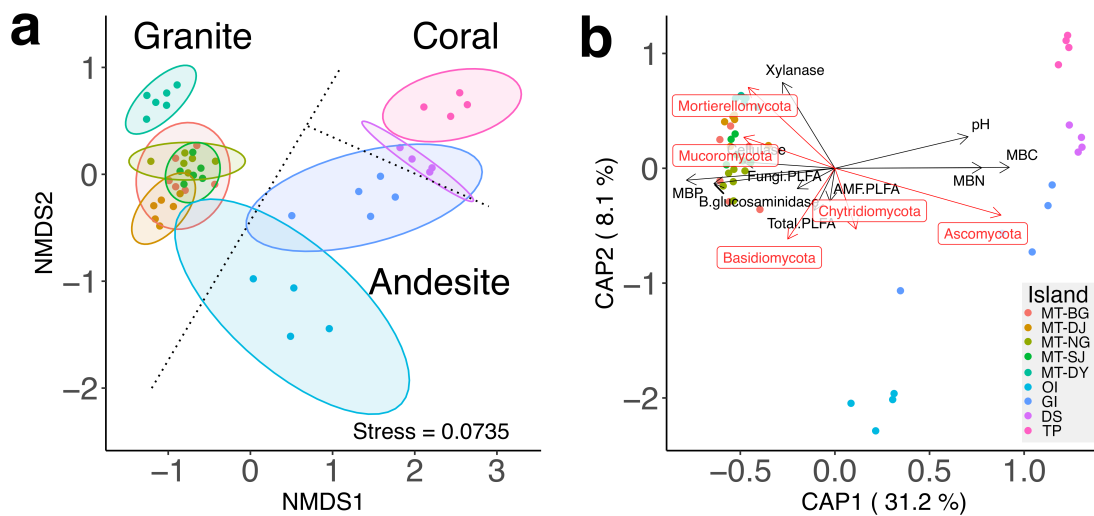

386

387

388 **Fig. 4. Ordination analysis of the offshore island soil mycobiomes. a.** Non-metric  
389 dimensional scaling (NMDS) of fungal profiles. **b.** Biplot diagram showing the  
390 constrained ordination (distance-based redundancy analysis) using edaphic data and the  
391 abundance data from the five most dominant phyla. Points represent sampling sites and  
392 colours denote different islands.

393

394

### 395 **3.3 Comparison of taxonomic profile and fungal abundance revealed dominance** 396 **of *Mortierella* in the soil**

397 The overview of the fungal composition profiles showed a high abundance of  
398 either Mortierellomycota (MT-BG, MT-NG, MT\_DJ, MT-SJ and OI) or Ascomycota  
399 (GI, DS and TI; **Fig. 5a**). Interestingly, OI was found to have a high proportion of  
400 Mortierellomycota (mean abundance = 60.3%), albeit distant from MT and with  
401 different soil types. We found that the genus *Mortierella* alone comprised 11–65% of  
402 the total fungal relative abundance. Strikingly, nearly half of the total fungal abundance  
403 was dominated by only five *Mortierella* zOTUs on four of the nine islands (**Fig. 5b**).

404 Fifty-six zOTUs were found across all nine islands (hereafter termed cosmopolitan  
 405 zOTUs), contributing on average 24.12% of the samples' relative abundances  
 406 (maximum, minimum and median relative abundance contributed = 38.5%, 4.48% and  
 407 23.06%, respectively). Furthermore, the abundance composition profiles contributed  
 408 by the cosmopolitan zOTUs were similar to the dominant fungal phyla on each island,  
 409 except for OI (Fig. 5c, Supplementary Table 4). While the cosmopolitan zOTUs  
 410 represented the Mortierellomycota abundance in MT, they only contributed marginally  
 411 to the relative abundance in OI (4.48%), indicating that unique *Mortierella* taxa were  
 412 present.

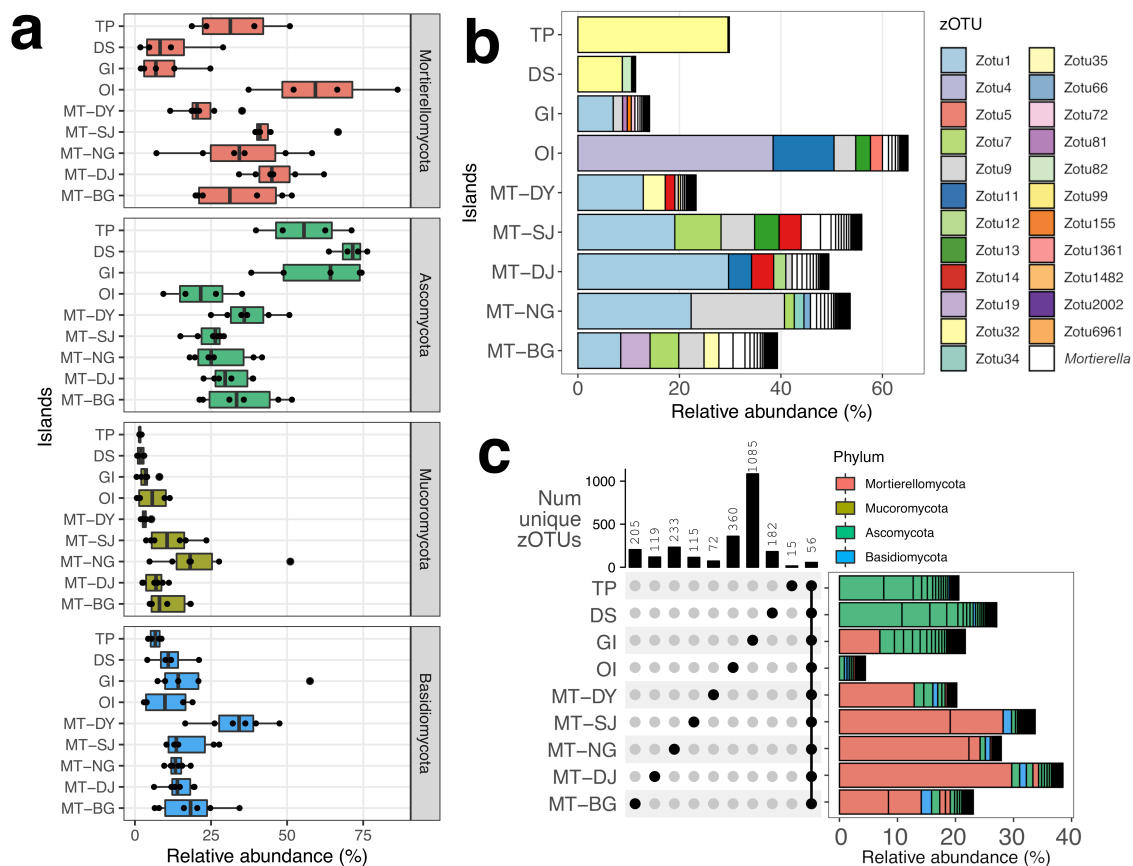

413

414 **Fig. 5. Relative abundance and composition of the offshore islands soil microbiome.**

415 **a.** Summary of the relative abundance of the four most abundant phyla on the nine  
 416 offshore islands. Points represent the sample sites. **b.** Relative abundance of the genus  
 417 *Mortierella* on each island; the five most abundant *Mortierella* zOTUs from each island  
 418 are denoted by different colours. **c.** Upset diagram showing the number of overlapping  
 419 and unique zOTUs from each island. Adjoined bar plot shows the relative abundance  
 420 of the 56 cosmopolitan zOTUs on each island; phyla are denoted by different colours.

421

422



### 423 3.4 Correlation network analysis revealed *Mortierella* as a keystone species in soil 424 mycobiome

425 The putative importance of the dominant genus *Mortierella* and its relationship  
426 with other species were explored using network analysis. The number of interacting  
427 zOTUs and interaction strengths were represented by the zOTU degree and node  
428 strength, respectively. A similar degree was detected among different phyla on each  
429 island. Mortierellomycota and Mucoromycota exhibited higher median degree,  
430 albeit not significant except for MT-NG (**Fig. 6a**; ANOVA, Mortierellomycota-  
431 Mucoromycota  $P=0.011$ ; Mortierellomycota-Ascomycota  $P=0.037$ ;  
432 Mortierellomycota-Basidiomycota  $P=0.001$ ; **Supplementary Table 5**).  
433 Mortierellomycota-dominant islands showed Mortierellomycota zOTUs with high  
434 node strength compared to other phyla (**Fig. 6a, Supplementary Table 6**). zOTUs were  
435 next classified into peripheral, connector, module hub or hub nodes within a network.  
436 The majority of the zOTUs were defined as connector and peripheral nodes (**Fig. 6b**).  
437 In total, 26 network hubs and 19 module hubs were characterised from the nine islands  
438 (**Fig. 6c**). The seven of the 45 hub species (**Supplementary Table 7**; zOTU1 -  
439 *Mortierella*, zOTU7 - *Mortierella*, zOTU21 - *Clonostachys*, zOTU75 - *Trichoderma*,  
440 zOTU226 - *Clonostachys*, zOTU304 - *Staphylotrichum*, and zOTU333 - *Aspergillus*)  
441 were ubiquitous across islands; these genera are readily found in the environment as  
442 saprophytes [11]. *Mortierella* (zOTU1 and zOTU7) and *Trichoderma* (zOTU75)  
443 species were correlated with degradative enzyme activities (**Supplementary Fig. 4**).  
444 Together, these results suggest that *Mortierella* is an integral member of the soil  
445 community. It is highly connected to other species, hence classified as hub nodes, and  
446 shown by the high intra-network and inter-module connectivity.

447

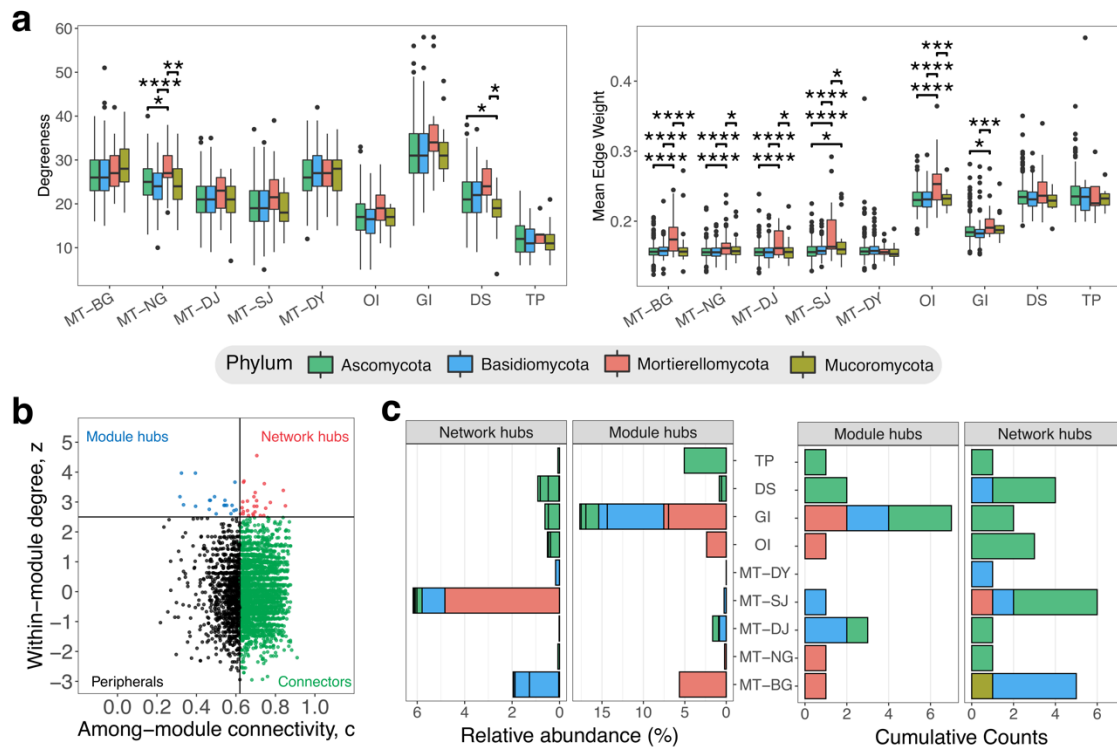

448

449 **Fig 6. Correlation network statistics of the offshore islands soil mycobiome. a.**  
 450 Degree and mean edge weight (node strength) distribution of the four most  
 451 dominant fungal phyla from correlation networks on each island. Significant  
 452 differences between fungal phyla within the island are labelled with asterisks ( $P \leq 0.05$   
 453  $= *$ ;  $P \leq 0.01 = **$ ;  $P \leq 0.005 = ***$ ;  $P \leq 0.001 = ****$ ). **b.** Classification of zOTUs  
 454 into hubs, connectors or peripherals nodes. **c.** Number of module and network hubs,  
 455 and their respective relative abundance in each island.

456

### 457 3.5 De novo assemblies and phylogenomics of Taiwanese *Mortierella* isolates

458 Motivated by our results that *Mortierella* is an important genus in the soil fungal  
 459 community, we isolated, sequenced and annotated seven *Mortierella* isolates (Methods).  
 460 The assemblies range 34.5-55.5Mb in size from 313,449-1,313,866 Oxford Nanopore  
 461 long reads which were subsequently polished with Illumina reads (average Nanopore  
 462 read N50 = 20.8kb; contig N50 = 3.65Mb; **Supplementary Table 1**). These assemblies  
 463 were highly contiguated compared to published *Mortierella* genomes, for example the  
 464 new *M. elongata* SJ01-01 assembly has a N90 of 1.68Mb compared to *M. elongata*  
 465 NVP64 with N90 of 1.15Mb. Using the available *Mortierella* and transcriptome  
 466 sequencing from mycelium, we annotated 8,389-13,336 gene models using the  
 467 MAKER2 pipeline (**Supplementary Table 1**). Assessment the completeness of  
 468 annotation using BUSCO (benchmarking universal single-copy orthologs) suggest that

469 they are 95.0-98.4% complete, which is comparable to available proteomes in these  
470 species (**Supplementary Table 1**). Finally, we attempted to place these species  
471 phylogenetically by constructing a phylogeny either from i) ITS (**Supplementary**  
472 **Figure 5**) or ii) 528 single copy orthologues (**Fig. 7**). Based on previously described  
473 classification system [56], we classified both isolate SJ01-01 and BG05-11 as *M.*  
474 *elongata*, NG01-01 as *M. minutissima*. BG05-04, and SJ01-07 were placed in the  
475 Gamsii clade sister to *M. elongata*. Two isolates NG01-10 and NG01-12 were grouped  
476 with *M. wolfii* and *M. alpina* in the ITS phylogeny, respectively, but were singly placed  
477 without any species in the species phylogeny, suggesting that they were the first  
478 assembly for these species (**Fig. 7**).  
479

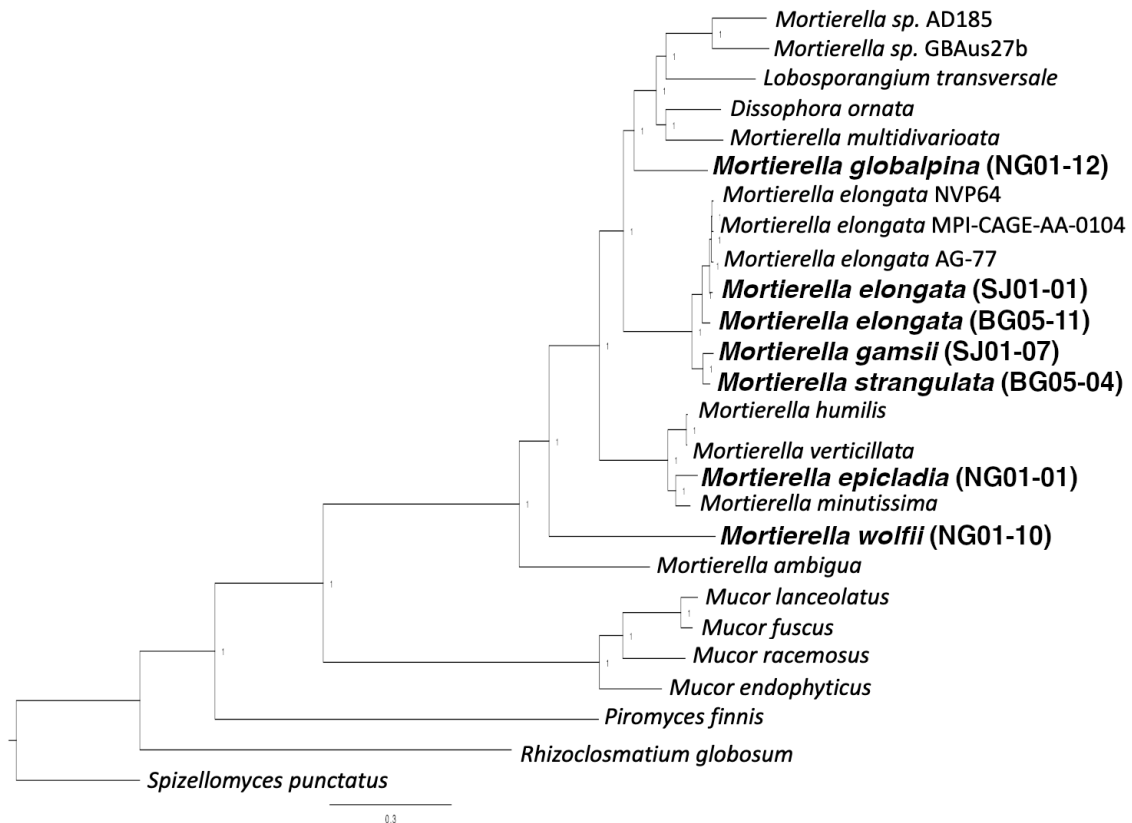

480

481 **Figure 7.** Phylogenetic tree of *Mortierella* genomes based on 528 single copy orthologs.  
482 Text in bracket denote isolate ID. Bald letter indicate species made available in this  
483 study.

484

485

486

487

488

### 489 3.6 *Mortierella*-annotated PICRUSt2 database improves functional predictions for 490 the surface soil mycobiome

491 We incorporated genomic data from the *Mortierella* genomes, which increased the  
492 putative relative abundance coverage of PICRUSt2 by 62.91% and 31.41% at the genus  
493 and phylum level, respectively, compared to covering 8.28% (141 zOTUs) and 66.34%  
494 (8,153 zOTUs) at the genus and phylum level, respectively (**Fig. 8a**). The ordination of  
495 KO profiles indicated that *Mortierella* abundance is a significant variable (*adonis*,  
496  $P=0.01$ ) regardless of whether or not *Mortierella* genomes are added. However, visual  
497 inspection of the improved database showed a tighter grouping for islands with high  
498 *Mortierella* abundance and a high percent variation explained on the first principle  
499 component (Original PC1 vs improved PC1; 41% vs 58%; **Fig. 8b**).

500

501

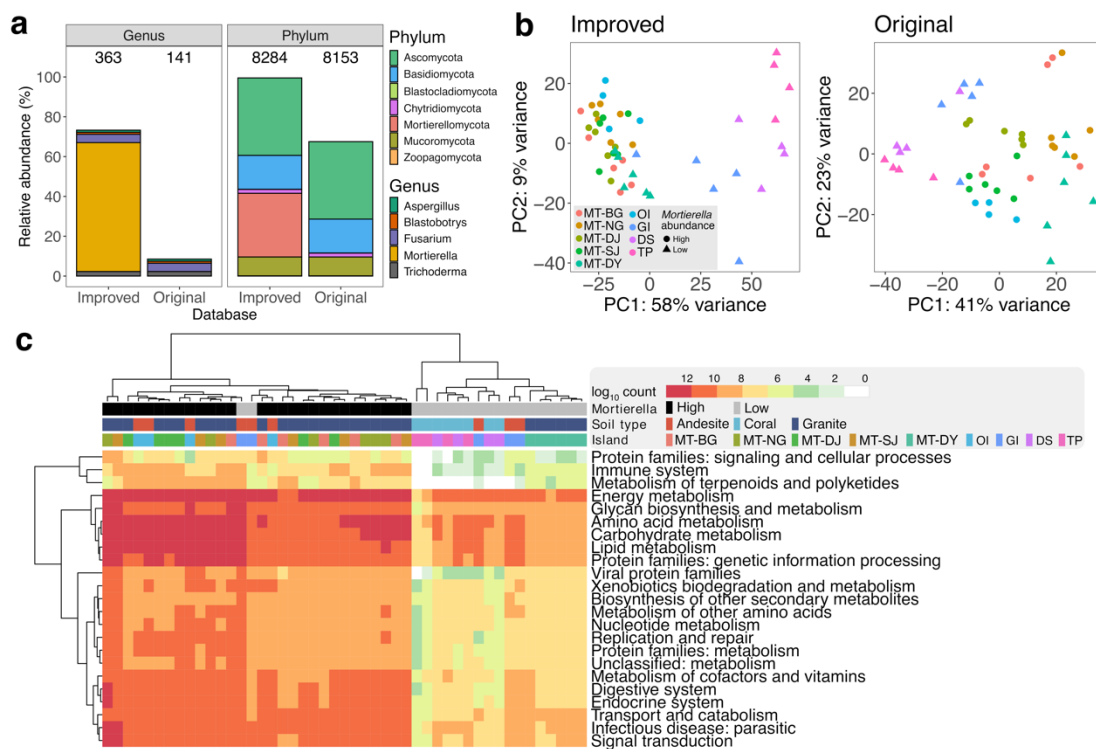

502

503 **Fig. 8.** **a.** Estimated relative abundance coverage of the soil mycobiome at the genus  
504 and phylum levels comparing results from the improved and original PICRUSt2  
505 pipelines. Number of zOTU covered are shown at the top of the bar plot. **b.** Principal  
506 coordinate analysis of the predicted KO profiles. Each point represents a sample site.  
507 Colours and shapes denote a different island and *Mortierella* abundance, respectively.  
508 **c.** Heatmap showing differentially abundant KOs predicted using the improved  
509 PICRUSt2 database grouped based on KEGG BRITE hierarchy level 2.

510

511 To highlight the difference in prediction results between the improved and original  
512 databases, differentially-abundant KOs and pathways were determined from DESeq2  
513 analyses. No notable differences were observed in the number of differential pathways  
514 predicted from both databases; however, the improved database predicted almost 10  
515 times more differential KOs than the original database (**Supplementary Table 8**.  
516 original vs improved; 25 vs 243 and 19 vs 133 for increased and decrease KOs,  
517 respectively). The heatmap indicated that differential KOs clustered according to  
518 *Mortierella* abundance, and not with the island *per se* or soil type (**Fig. 8c**). KOs with  
519 the most significant differential increase were detected in Energy metabolism, Glycan  
520 biosynthesis and metabolism, Amino acid metabolism, Carbohydrate metabolism,  
521 Lipid metabolism and Protein families: genetic information processing (**Fig. 8c**).  
522 Predictions made using the original database did not show significant changes in these  
523 categories (**Supplementary Fig. 6**). In the gene-level analysis, *Mortierella*'s role as a  
524 decomposer in soil was further highlighted by the increase we observed in the number  
525 of predicted carbohydrate-active enzymes (CAZy)—e.g., the differential increase in  
526 hexosaminidase (HEX), part of the glycosyl hydrolase 20 family (GH20). These widely  
527 distributed genes catalyse glycosidic-linked N-acetylhexosamine residue cleavage in  
528 N-acetylglucosamine and N-acetylgalactosamine, which plays a vital role in chitin, and  
529 cell wall turnover [57,58] (**Supplementary Fig. 7**). Malate dehydrogenase (*mdh*) has  
530 been reported to be expressed by filamentous fungi in association with the degradation  
531 of biopolymers [59] (**Supplementary Fig. 8**). The fatty acid production ability of  
532 *Mortierella* was also reflected by the significant increase in acetyl-CoA carboxylase,  
533 which controls the production of malonyl-CoA, a vital intermediate substrate, in fatty  
534 acid biosynthesis and degradation [60,61] (**Supplementary Fig. 9**). Other enzymes  
535 associated with fatty acid metabolism were predicted, such as the phospholipase A2  
536 (PLA2) [62], UTP-glucose-1-phosphate uridylyltransferase (UGP3) and glycerol  
537 dehydrogenase (*golD*) [63] (**Supplementary Fig. 10**). Altogether, these results suggest  
538 our ability to correlate *Mortierella*'s role in the soil as a saprophyte [64] and free fatty  
539 acid producer [65] using improved functional prediction workflow.

540

541

542

543

## 544 4. Discussion

545

546 Amplicon sequencing remains a highly efficient and cost-effective method to  
547 obtain a holistic view of the niche species compositions and functions in microbial  
548 ecology. We have characterised the soil mycobiome from 141 samples across nine  
549 islands, highlighted *Mortierella* dominance as keystone species. The availability of the  
550 17 new *Mortierella* genomes provided the genomic resource for the curation of  
551 PICRUST2 database, which revealed differentially functional genes associated with  
552 ecological roles of *Mortierella* on islands where it is dominant, otherwise could not be  
553 detected from default database. Our approach demonstrated the importance of  
554 providing genomic data from key taxa in amplicon gene prediction studies to better  
555 reflect the mycobiome functional roles. The improved database has revealed significant  
556 differences at the gene levels (KO) but not at the pathway level. This further emphasis  
557 the functional redundancy phenomenon in microbial [66] and fungal communities [67].  
558 This has provided initial insights into soil mycobiome functions in association with  
559 biogeography patterns, where we observed alike functions from mycobiome in  
560 independent islands with significant compositional differences. In addition, it is worth  
561 noting that Ascomycota, which consisted 4,955 of the zOTU covered (38.2% of total  
562 zOTUs), remained poorly represented at the genus level even for this relatively well-  
563 studied phylum. This calls for attentions to the continual need to expand the existing  
564 fungal genome database to ascertain details about fungal functional relationship with  
565 respect to biogeography theories.

566

567 Intuitively, highly taxa abundance are associated with being a key member or  
568 having a significant impact on their niche [68,69]. Pervasiveness, persistence and being  
569 highly connected to other species are typical characteristics that enable keystone  
570 species to orchestrate community functions for adaptation. However, keystone species  
571 are not necessary the most dominant population in the community [70]. Core bacterial  
572 taxa in agricultural soil has been shown with a wide-range of relative abundance  
573 irrespective of their role in nutrient cycling [71]. The 56 cosmopolitan zOTUs are  
574 putative core soil taxa due to their pervasiveness. Our study has demonstrated that  
575 *Mortierella* species stood out from the rest of cosmopolitan zOTUs, possessing multiple  
576 keystone species attributes. *Mortierella*'s role as decomposers were reflected with high  
577 correlation to degradative enzyme activities. Interactions of *Mortierella* with other



578 cosmopolitan zOTUs for community-level functions or temporal persistence of these  
579 putative core taxa warrants further investigation.

580

581 We demonstrated that insular fungal diversity is positively correlated with island  
582 area and distance, which congruent with the original island biogeography theory [72].  
583 However, beta diversity remained equally dissimilar despite difference in island size.  
584 We hypothesised that colonisable space was not the limiting factor for fungal diversity  
585 unlike large and higher order organism such as plants and mammals. A lowered  
586 extinction rate and colonisation rate are associated with larger island; habitat and  
587 species diversity are more likely to be maintained, hence similar level of beta diversity.  
588 Despite the fact our sampling strategies focus on the region of the island away from  
589 human activities. We acknowledge that this resulted in islands not being extensively  
590 sampled. Thus, it is likely the increase in the island size did not truly reflect the increase  
591 in the variety of niches.

592

593 Our finding showed coral islands are coupled with lower fungal and plant diversity  
594 compared to other islands. Coral are highly porous; the low trace-nutrients and water-  
595 retention properties do not favour plant growth [73]. While plant being a significant  
596 determinant for fungal diversity [11], this translates to lowered soil fungal diversity as  
597 reported in other oceanic coral islands [74]. Microbiome study of Taiwan's offshore  
598 island have highlighted the difference and important in soil type and the distinct  
599 microbiome structure observed between the Matsu archipelagos, GI and OI [33]. Soil  
600 nutrient dynamics are inherently linked with soil properties, which affect microbial  
601 growth physiology; therefore, it was expected for mycobiome to cluster according to  
602 rock type. A comprehensive edaphic data is also critical to explain putative role and  
603 presence of certain species. For example, MBP was positively correlated with  
604 mycobiome in granite islands. This correlation may be accounted by the high  
605 Mortierellomycota abundance, which are known for their role in soil phosphate  
606 solubilisation [75].

607

608

609

610

611



## 612 **5. Conclusion**

613

614 To conclude, the identification of incorporation of key fungal taxon to functional  
615 inference pipeline has significantly increased the amount of sequence abundance  
616 covered as well as revealed otherwise unpredicted differential KO associated with  
617 *Mortierella* metabolism. We believe the principle of this workflow can be tested on a  
618 perturbed system to better delineate the relationship between changes in microbial  
619 composition and pathway as well as biogeography relationship and overall functional  
620 changes in the mycobiome. The global effect in the continual discovery and curation of  
621 fungal genomes will undoubtedly aid *in silico* studies in the future.

622

623

## 624 **Acknowledgement**

625 This research was funded by the Ministry of Science and Technology, Taiwan (Grant  
626 nos. 107-2313-B-001-003 and 107-2621-M-001-001). The funders had no role in the  
627 study's design, data collection and analysis, decision to publish, or preparation of the  
628 manuscript. We thank members of Dr. Chih-Yu Chiu's laboratory especially Pei-Yi Yu  
629 for assistance with field sampling and the collection of edaphic data. We thank the  
630 following for permission to use the following assemblies from JGI for species  
631 phylogeny and inferred metagenomics analyses: Gregory Bonito for *Mortierella* sp.  
632 AD185, *Mortierella* sp. GBAus27b, *Mortierella gamsii* AM1032, *Mortierella elongata*  
633 NVP64, *Mortierella humilis* PM\_1414, *Mortierella minutissima* AD051 and  
634 *Mortierella ambigua* NRRL 28271, and *Mortierella wolfii* NRRL 6351, Joseph  
635 Spatafora for *Dissophora ornata* CBS347.77, *Mortierella multivaricata* RSA2152T,  
636 *Lobosporangium transversale* NRRL 3116, Rytas Vilgalys and Andrii Gryganskyi for  
637 *Mortierella elongata* AG-77.

638

## 639 **Authors contribution**

640 I.J.T conceived and led the study. Y.F.L, I.J.T, Y.C.L, Y.J.L, E.H.C and C.Y.C  
641 carried out the sampling. Y.F.L, W.A.L and Y.J.L conducted the experiments. M.J.L and  
642 her team conducted experiments regarding high-throughput sequencing. W.A.L isolated  
643 the *Mortierella* strains and carried out the nanopore sequencing. H.H.L, Y.C.L, I.J.T  
644 carried out the sequence assembly and annotation. Y.F.L carried out the amplicon,  
645 correlation network and PICRUSt2 analysis. Y.F.L wrote the manuscript with inputs  
646 from I.J.T and C.Y.C.

647

648 **Data availability**

649 Raw data, assemblies and annotation of the seven *Mortierella* isolates were  
650 deposited in the National Center for Biotechnology Information (accession no.  
651 PRJNA778874).

652

653 **Abbreviation**

|     |         |                                                                |
|-----|---------|----------------------------------------------------------------|
| 654 | ITS     | Internal transcribed spacer                                    |
| 655 | zOTU    | zero-radius operational taxonomic unit                         |
| 656 | KEGG    | Kyoto Encyclopaedia of Genes and Genomes                       |
| 657 | KO      | KEGG orthologues                                               |
| 658 | PICRUSt | Phylogenetic investigation of communities by reconstruction of |
| 659 |         | unobserved states                                              |
| 660 | PDA     | Potato dextrose agar                                           |
| 661 | PBS     | Phosphate buffered saline                                      |
| 662 | PLFA    | phospholipid-derived fatty acid                                |
| 663 | MBC     | Microbial biomass carbon                                       |
| 664 | MBP     | Microbial biomass phosphorus                                   |
| 665 | MBN     | Microbial biomass nitrogen                                     |
| 666 | AMF     | Arbuscular mycorrhizal fungi                                   |
| 667 | MMT     | Mean monthly temperature                                       |
| 668 | MMP     | Mean monthly precipitation                                     |
| 669 | MT      | Matsu archipelagos                                             |
| 670 | MT-BG   | Beigan Island                                                  |
| 671 | MT-NG   | Nangan Island                                                  |
| 672 | MT-DJ   | Dongju Island                                                  |
| 673 | MT-SJ   | Hsiju Island                                                   |
| 674 | MT-DY   | Dongyin Islet                                                  |
| 675 | OI      | Orchid Island                                                  |
| 676 | GI      | Green Island                                                   |
| 677 | DS      | Dongsha Islet                                                  |
| 678 | TP      | Taiping Islet                                                  |
| 679 | NMDS    | Non-metric dimensional scaling                                 |

680

681

## 682 **References**

- 683 [1] Baldrian P, Větrovský T, Lepinay C, Kohout P. High-throughput sequencing  
684 view on the magnitude of global fungal diversity. *Fungal Divers* 2021.  
685 <https://doi.org/10.1007/s13225-021-00472-y>.
- 686 [2] De Boer W, Folman LB, Summerbell RC, Boddy L. Living in a fungal world:  
687 Impact of fungi on soil bacterial niche development. *FEMS Microbiol Rev*  
688 2005;29:795–811. <https://doi.org/10.1016/j.femsre.2004.11.005>.
- 689 [3] Cantrell SA, Dianese JC, Fell J, Gunde-Cimerman N, Zalar P. Unusual fungal  
690 niches. *Mycologia* 2011;103:1161–74. <https://doi.org/10.3852/11-108>.
- 691 [4] Caporaso JG, Lauber CL, Walters WA, Berg-Lyons D, Lozupone CA,  
692 Turnbaugh PJ, et al. Global patterns of 16S rRNA diversity at a depth of  
693 millions of sequences per sample. *Proc Natl Acad Sci U S A* 2011;108:4516–  
694 22. <https://doi.org/10.1073/pnas.1000080107>.
- 695 [5] Thompson LR, Sanders JG, McDonald D, Amir A, Ladau J, Locey KJ, et al. A  
696 communal catalogue reveals Earth’s multiscale microbial diversity. *Nature*  
697 2017;551:457–63. <https://doi.org/10.1038/nature24621>.
- 698 [6] Gilbert JA, Meyer F, Antonopoulos D, Balaji P, Brown CT, Brown CT, et al.  
699 Meeting Report: The Terabase Metagenomics Workshop and the Vision of an  
700 Earth Microbiome Project. *Stand Genomic Sci* 2010;3:243–8.  
701 <https://doi.org/10.4056/sigs.1433550>.
- 702 [7] Gilbert JA, Jansson JK, Knight R. The Earth Microbiome project: Successes  
703 and aspirations. *BMC Biol* 2014;12:1–4. <https://doi.org/10.1186/s12915-014-0069-1>.
- 704
- 705 [8] Amaral-Zettler LA, McCliment EA, Ducklow HW, Huse SM. A method for  
706 studying protistan diversity using massively parallel sequencing of V9  
707 hypervariable regions of small-subunit ribosomal RNA *Genes*. *PLoS One*  
708 2009;4:1–9. <https://doi.org/10.1371/journal.pone.0006372>.
- 709 [9] Schoch CL, Seifert KA, Huhndorf S, Robert V, Spouge JL, Levesque CA, et al.  
710 Nuclear ribosomal internal transcribed spacer (ITS) region as a universal DNA  
711 barcode marker for Fungi. *Proc Natl Acad Sci U S A* 2012;109:6241–6.  
712 <https://doi.org/10.1073/pnas.1117018109>.
- 713 [10] Gillevet PM, Sikaroodi M, Torzilli AP. Analyzing salt-marsh fungal diversity:  
714 comparing ARISA fingerprinting with clone sequencing and pyrosequencing.  
715 *Fungal Ecol* 2009;2:160–7. <https://doi.org/10.1016/j.funeco.2009.04.001>.
- 716 [11] Tedersoo L, Bahram M, Põlme S, Kõljalg U, Yorou NS, Wijesundera R, et al.

- 717 Global diversity and geography of soil fungi. *Science* (80- )  
718 2014;346:1256688. <https://doi.org/10.1126/science.1256688>.
- 719 [12] Bahram M, Hildebrand F, Forslund SK, Anderson JL, Soudzilovskaia NA,  
720 Bodegom PM, et al. Structure and function of the global topsoil microbiome.  
721 *Nature* 2018;560:233–7. <https://doi.org/10.1038/s41586-018-0386-6>.
- 722 [13] Egidi E, Delgado-Baquerizo M, Plett JM, Wang J, Eldridge DJ, Bardgett RD,  
723 et al. A few Ascomycota taxa dominate soil fungal communities worldwide.  
724 *Nat Commun* 2019;10:2369. <https://doi.org/10.1038/s41467-019-10373-z>.
- 725 [14] Tedersoo L, May TW, Smith ME. Ectomycorrhizal lifestyle in fungi: Global  
726 diversity, distribution, and evolution of phylogenetic lineages. *Mycorrhiza*  
727 2010;20:217–63. <https://doi.org/10.1007/s00572-009-0274-x>.
- 728 [15] Bahram M, Kõljalg U, Courty PE, Diédhiou AG, Kjølner R, Põlme S, et al. The  
729 distance decay of similarity in communities of ectomycorrhizal fungi in  
730 different ecosystems and scales. *J Ecol* 2013;101:1335–44.  
731 <https://doi.org/10.1111/1365-2745.12120>.
- 732 [16] Davison J, Moora M, Semchenko M, Adenan SB, Ahmed T, Akhmetzhanova  
733 AA, et al. Temperature and pH define the realised niche space of arbuscular  
734 mycorrhizal fungi. *New Phytol* 2021;231:763–76.  
735 <https://doi.org/10.1111/nph.17240>.
- 736 [17] Schneider AN, Sundh J, Sundström G, Richau K, Delhomme N, Grabherr M, et  
737 al. Comparative Fungal Community Analyses Using Metatranscriptomics and  
738 Internal Transcribed Spacer Amplicon Sequencing from Norway Spruce.  
739 *MSystems* 2021;6. <https://doi.org/10.1128/msystems.00884-20>.
- 740 [18] Shakya M, Lo CC, Chain PSG. Advances and challenges in metatranscriptomic  
741 analysis. *Front Genet* 2019;10:1–10. <https://doi.org/10.3389/fgene.2019.00904>.
- 742 [19] Aßhauer KP, Wemheuer B, Daniel R, Meinicke P. Tax4Fun: Predicting  
743 functional profiles from metagenomic 16S rRNA data. *Bioinformatics*  
744 2015;31:2882–4. <https://doi.org/10.1093/bioinformatics/btv287>.
- 745 [20] Sansupa C, Wahdan SFM, Hossen S, Disayathanoowat T, Wubet T, Purahong  
746 W. Can we use functional annotation of prokaryotic taxa (Faprotax) to assign  
747 the ecological functions of soil bacteria? *Appl Sci* 2021;11:1–17.  
748 <https://doi.org/10.3390/app11020688>.
- 749 [21] Douglas GM, Maffei VJ, Zaneveld JR, Yurgel SN, Brown JR, Taylor CM, et  
750 al. PICRUSt2 for prediction of metagenome functions. *Nat Biotechnol*  
751 2020;38:685–8. <https://doi.org/10.1038/s41587-020-0548-6>.

- 752 [22] Gong C, Yang L, Liu K, Shen S, Zhang Q, Li H, et al. Effects of antibiotic  
753 treatment and probiotics on the gut microbiome of 40 infants delivered before  
754 term by cesarean section analysed by using 16s rRNA quantitative polymerase  
755 chain reaction sequencing. *Med Sci Monit* 2021;27.  
756 <https://doi.org/10.12659/MSM.928467>.
- 757 [23] Mei L, Zhou J, Su Y, Mao K, Wu J, Zhu C, et al. Gut microbiota composition  
758 and functional prediction in diarrhea-predominant irritable bowel syndrome.  
759 *BMC Gastroenterol* 2021;21:1–12. [https://doi.org/10.1186/s12876-021-01693-](https://doi.org/10.1186/s12876-021-01693-w)  
760 [w](https://doi.org/10.1186/s12876-021-01693-w).
- 761 [24] Manzari C, Oranger A, Fosso B, Piancone E, Pesole G, D’Erchia AM.  
762 Accurate quantification of bacterial abundance in metagenomic DNAs  
763 accounting for variable DNA integrity levels. *Microb Genomics* 2020;6:1–10.  
764 <https://doi.org/10.1099/mgen.0.000417>.
- 765 [25] Khachatryan L, de Leeuw RH, Kraakman MEM, Pappas N, te Raa M, Mei H,  
766 et al. Taxonomic classification and abundance estimation using 16S and  
767 WGS—A comparison using controlled reference samples. *Forensic Sci Int*  
768 *Genet* 2020;46:102257. <https://doi.org/10.1016/j.fsigen.2020.102257>.
- 769 [26] Myer PR, Kim MS, Freetly HC, Smith TPL. Metagenomic and near full-length  
770 16S rRNA sequence data in support of the phylogenetic analysis of the rumen  
771 bacterial community in steers. *Data Br* 2016;8:1048–53.  
772 <https://doi.org/10.1016/j.dib.2016.07.027>.
- 773 [27] Grossetête S, Labedan B, Lespinet O. FUNGIpath: A tool to assess fungal  
774 metabolic pathways predicted by orthology. *BMC Genomics* 2010;11:1–15.  
775 <https://doi.org/10.1186/1471-2164-11-81>.
- 776 [28] Nguyen NH, Song Z, Bates ST, Branco S, Tedersoo L, Menke J, et al.  
777 FUNGuild: An open annotation tool for parsing fungal community datasets by  
778 ecological guild. *Fungal Ecol* 2016;20:241–8.  
779 <https://doi.org/10.1016/j.funeco.2015.06.006>.
- 780 [29] Caspi R, Billington R, Keseler IM, Kothari A, Krummenacker M, Midford PE,  
781 et al. The MetaCyc database of metabolic pathways and enzymes—a 2019  
782 update. *Nucleic Acids Res* 2020;48:D455–D453.  
783 <https://doi.org/10.1093/nar/gkz862>.
- 784 [30] Tedersoo L, Anslan S, Bahram M, Drenkhan R, Pritsch K, Buegger F, et al.  
785 Regional-Scale In-Depth Analysis of Soil Fungal Diversity Reveals Strong pH  
786 and Plant Species Effects in Northern Europe. *Front Microbiol* 2020;11:1–31.

- 787 <https://doi.org/10.3389/fmicb.2020.01953>.
- 788 [31] Martiny JBH, Bohannan BJM, Brown JH, Colwell RK, Fuhrman JA, Green JL,  
789 et al. Microbial biogeography: Putting microorganisms on the map. *Nat Rev*  
790 *Microbiol* 2006;4:102–12. <https://doi.org/10.1038/nrmicro1341>.
- 791 [32] Whittaker RJ, Fernández-Palacios JM, Matthews TJ, Borregaard MK, Triantis  
792 KA. Island biogeography: Taking the long view of nature's laboratories.  
793 *Science* (80-) 2017;357. <https://doi.org/10.1126/science.aam8326>.
- 794 [33] Lin Y Te, Lin YF, Tsai IJ, Chang EH, Jien SH, Lin YJ, et al. Structure and  
795 Diversity of Soil Bacterial Communities in Offshore Islands. *Sci Rep*  
796 2019;9:1–9. <https://doi.org/10.1038/s41598-019-41170-9>.
- 797 [34] Chang EH, Tsai IJ, Jien SH, Tian G, Chiu CY. Biogeographic changes in forest  
798 soil microbial communities of offshore islands—A case study of remote islands  
799 in Taiwan. *Forests* 2021;12:1–12. <https://doi.org/10.3390/f12010004>.
- 800 [35] White TJ, Bruns T, Lee S, Taylor J. Amplification and direct sequencing of  
801 fungal ribosomal RNA genes for phylogenetics. *PCR Protoc.*, Elsevier; 1990,  
802 p. 315–22. <https://doi.org/10.1016/B978-0-12-372180-8.50042-1>.
- 803 [36] Mayjonade B, Gouzy J, Donnadieu C, Pouilly N, Marande W, Callot C, et al.  
804 Extraction of high-molecular-weight genomic DNA for long-read sequencing  
805 of single molecules. *Biotechniques* 2016;61:203–5.  
806 <https://doi.org/10.2144/000114460>.
- 807 [37] Edgar RC. UPARSE: Highly accurate OTU sequences from microbial  
808 amplicon reads. *Nat Methods* 2013;10:996–8.  
809 <https://doi.org/10.1038/nmeth.2604>.
- 810 [38] Edgar R. UNOISE2: improved error-correction for Illumina 16S and ITS  
811 amplicon sequencing. *BioRxiv* 2016:081257. <https://doi.org/10.1101/081257>.
- 812 [39] Edgar R. SINTAX: a simple non-Bayesian taxonomy classifier for 16S and ITS  
813 sequences. *BioRxiv* 2016:074161. <https://doi.org/10.1101/074161>.
- 814 [40] O'Leary NA, Wright MW, Brister JR, Ciuffo S, Haddad D, McVeigh R, et al.  
815 Reference sequence (RefSeq) database at NCBI: Current status, taxonomic  
816 expansion, and functional annotation. *Nucleic Acids Res* 2016;44:D733–45.  
817 <https://doi.org/10.1093/nar/gkv1189>.
- 818 [41] Watts SC, Ritchie SC, Inouye M, Holt KE. FastSpar: Rapid and scalable  
819 correlation estimation for compositional data. *Bioinformatics* 2019;35:1064–6.  
820 <https://doi.org/10.1093/bioinformatics/bty734>.
- 821 [42] Friedman J, Alm EJ. Inferring Correlation Networks from Genomic Survey



- 822 Data. PLoS Comput Biol 2012;8:1–11.  
823 <https://doi.org/10.1371/journal.pcbi.1002687>.
- 824 [43] Langfelder P, Horvath S. WGCNA: An R package for weighted correlation  
825 network analysis. BMC Bioinformatics 2008;9. [https://doi.org/10.1186/1471-](https://doi.org/10.1186/1471-2105-9-559)  
826 [2105-9-559](https://doi.org/10.1186/1471-2105-9-559).
- 827 [44] Olesen JM, Bascompte J, Dupont YL, Jordano P. The modularity of pollination  
828 networks. Proc Natl Acad Sci U S A 2007;104:19891–6.  
829 <https://doi.org/10.1073/pnas.0706375104>.
- 830 [45] Dobin A, Davis CA, Schlesinger F, Drenkow J, Zaleski C, Jha S, et al. STAR:  
831 Ultrafast universal RNA-seq aligner. Bioinformatics 2013;29:15–21.  
832 <https://doi.org/10.1093/bioinformatics/bts635>.
- 833 [46] Pertea M, Pertea GM, Antonescu CM, Chang TC, Mendell JT, Salzberg SL.  
834 StringTie enables improved reconstruction of a transcriptome from RNA-seq  
835 reads. Nat Biotechnol 2015;33:290–5. <https://doi.org/10.1038/nbt.3122>.
- 836 [47] Grabherr MG, Haas BJ, Yassour M, Levin JZ, Thompson DA, Amit I, et al.  
837 Full-length transcriptome assembly from RNA-Seq data without a reference  
838 genome. Nat Biotechnol 2011;29:644–52. <https://doi.org/10.1038/nbt.1883>.
- 839 [48] Venturini L, Caim S, Kaithakottil GG, Mapleson DL, Swarbreck D.  
840 Leveraging multiple transcriptome assembly methods for improved gene  
841 structure annotation. Gigascience 2018;7:1–15.  
842 <https://doi.org/10.1093/gigascience/giy093>.
- 843 [49] Brůna T, Hoff KJ, Lomsadze A, Stanke M, Borodovsky M. BRAKER2:  
844 automatic eukaryotic genome annotation with GeneMark-EP+ and  
845 AUGUSTUS supported by a protein database. NAR Genomics Bioinforma  
846 2021;3:1–11. <https://doi.org/10.1093/nargab/lqaa108>.
- 847 [50] Holt C, Yandell M. MAKER2: An annotation pipeline and genome-database  
848 management tool for second-generation genome projects. BMC Bioinformatics  
849 2011;12. <https://doi.org/10.1186/1471-2105-12-491>.
- 850 [51] Simão FA, Waterhouse RM, Ioannidis P, Kriventseva E V., Zdobnov EM.  
851 BUSCO: Assessing genome assembly and annotation completeness with  
852 single-copy orthologs. Bioinformatics 2015;31:3210–2.  
853 <https://doi.org/10.1093/bioinformatics/btv351>.
- 854 [52] Wagner L, Stielow B, Hoffmann K, Petkovits T, Papp T, Hoog GS De, et al. A  
855 comprehensive molecular phylogeny of the Mortierellales  
856 ( Mortierellomycotina ) based on nuclear ribosomal DNA 2013:77–93.



- 857 [53] Emms DM, Kelly S. OrthoFinder: solving fundamental biases in whole  
858 genome comparisons dramatically improves orthogroup inference accuracy.  
859 *Genome Biol* 2015;16:1–14. <https://doi.org/10.1186/s13059-015-0721-2>.
- 860 [54] Price MN, Dehal PS, Arkin AP. FastTree 2 - Approximately maximum-  
861 likelihood trees for large alignments. *PLoS One* 2010;5.  
862 <https://doi.org/10.1371/journal.pone.0009490>.
- 863 [55] Stamatakis A. RAxML version 8: A tool for phylogenetic analysis and post-  
864 analysis of large phylogenies. *Bioinformatics* 2014;30:1312–3.  
865 <https://doi.org/10.1093/bioinformatics/btu033>.
- 866 [56] Vandepol N, Liber J, Desirò A, Na H, Kennedy M, Barry K, et al. Resolving  
867 the Mortierellaceae phylogeny through synthesis of multi-gene phylogenetics  
868 and phylogenomics. *Fungal Divers* 2020;In Press.  
869 <https://doi.org/10.1007/s13225-020-00455-5>.
- 870 [57] Intra J, Pavesi G, Horner DS. Phylogenetic analyses suggest multiple changes  
871 of substrate specificity within the Glycosyl hydrolase 20 family. *BMC Evol*  
872 *Biol* 2008;8:1–17. <https://doi.org/10.1186/1471-2148-8-214>.
- 873 [58] Bulawa CE. Genetics and molecular biology of chitin synthesis in fungi. *Annu*  
874 *Rev Microbiol* 1993;47:505–34.  
875 <https://doi.org/10.1146/annurev.mi.47.100193.002445>.
- 876 [59] Maloney AP, Callan SM, Murray PG, Tuohy MG. Mitochondrial malate  
877 dehydrogenase from the thermophilic, filamentous fungus *Talaromyces*  
878 *emersonii*. Purification of the native enzyme, cloning and overexpression of the  
879 corresponding gene. *Eur J Biochem* 2004;271:3115–26.  
880 <https://doi.org/10.1111/j.1432-1033.2004.04230.x>.
- 881 [60] Tong L. Structure and function of biotin-dependent carboxylases. *Cell Mol*  
882 *Life Sci* 2013;70:863–91. <https://doi.org/10.1007/s00018-012-1096-0>.
- 883 [61] Hunkeler M, Stutfeld E, Hagemann A, Imseng S, Maier T. The dynamic  
884 organization of fungal acetyl-CoA carboxylase. *Nat Commun* 2016;7:11196.  
885 <https://doi.org/10.1038/ncomms11196>.
- 886 [62] Dessen A, Tang J, Schmidt H, Stahl M, Clark JD, Seehra J, et al. Crystal  
887 structure of human cytosolic phospholipase A2 reveals a novel topology and  
888 catalytic mechanism. *Cell* 1999;97:349–60. [https://doi.org/10.1016/S0092-8674\(00\)80744-8](https://doi.org/10.1016/S0092-8674(00)80744-8).
- 889 [63] Sato H, Taketomi Y, Murakami M. Metabolic regulation by secreted  
890 phospholipase A2. *Inflamm Regen* 2016;36:1–7.  
891

- 892 <https://doi.org/10.1186/s41232-016-0012-7>.
- 893 [64] Crowther TW, Boddy L, Hefin Jones T. Functional and ecological  
894 consequences of saprotrophic fungus-grazer interactions. *ISME J* 2012;6:1992–  
895 2001. <https://doi.org/10.1038/ismej.2012.53>.
- 896 [65] Sakuradani E, Ando A, Ogawa J, Shimizu S. Improved production of various  
897 polyunsaturated fatty acids through filamentous fungus *Mortierella alpina*  
898 breeding. *Appl Microbiol Biotechnol* 2009;84:1–10.  
899 <https://doi.org/10.1007/s00253-009-2076-7>.
- 900 [66] Lozupone CA, Stombaugh JI, Gordon JI, Jansson JK, Knight R. Diversity,  
901 stability and resilience of the human gut microbiota. *Nature* 2012;489:220–30.  
902 <https://doi.org/10.1038/nature11550>.
- 903 [67] Banerjee S, Kirkby CA, Schmutter D, Bissett A, Kirkegaard JA, Richardson  
904 AE. Network analysis reveals functional redundancy and keystone taxa  
905 amongst bacterial and fungal communities during organic matter  
906 decomposition in an arable soil. *Soil Biol Biochem* 2016;97:188–98.  
907 <https://doi.org/10.1016/j.soilbio.2016.03.017>.
- 908 [68] Li P, Xue Y, Shi J, Pan A, Tang X, Ming F. The response of dominant and rare  
909 taxa for fungal diversity within different root environments to the cultivation of  
910 Bt and conventional cotton varieties. *Microbiome* 2018;6:1–15.  
911 <https://doi.org/10.1186/s40168-018-0570-9>.
- 912 [69] Bradley BA, Laginhas BB, Whitlock R, Allen JM, Bates AE, Bernatchez G, et  
913 al. Disentangling the abundance–impact relationship for invasive species. *Proc*  
914 *Natl Acad Sci U S A* 2019;116:9919–24.  
915 <https://doi.org/10.1073/pnas.1818081116>.
- 916 [70] Banerjee S, Schlaeppi K, van der Heijden MGA. Keystone taxa as drivers of  
917 microbiome structure and functioning. *Nat Rev Microbiol* 2018;16:567–76.  
918 <https://doi.org/10.1038/s41579-018-0024-1>.
- 919 [71] Jiao S, Xu Y, Zhang J, Hao X, Lu Y. Core Microbiota in Agricultural Soils and  
920 Their Potential Associations with Nutrient Cycling. *MSystems* 2019;4:1–16.  
921 <https://doi.org/10.1128/mSystems.00313-18>.
- 922 [72] MacArthur RH, Wilson EO. *The Theory of Island Biogeography*. Princeton  
923 University Press; 2001. <https://doi.org/10.1515/9781400881376>.
- 924 [73] Deenik JL, Yost RS. Chemical properties of atoll soils in the Marshall Islands  
925 and constraints to crop production. *Geoderma* 2006;136:666–81.  
926 <https://doi.org/10.1016/j.geoderma.2006.05.005>.

- 927 [74] Zheng Y, Maitra P, Gan H-Y, Chen L, Li S, Tu T, et al. Soil fungal diversity  
928 and community assembly: affected by island size or type? *FEMS Microbiol*  
929 *Ecol* 2021;97:1–9. <https://doi.org/10.1093/femsec/fiab062>.
- 930 [75] Ozimek E, Hanaka A. *Mortierella* species as the plant growth-promoting fungi  
931 present in the agricultural soils. *Agric* 2021;11:1–18.  
932 <https://doi.org/10.3390/agriculture11010007>.  
933
